# Supplementary material for: Expression of SOCS1 and the downstream targets of its putative tumor suppressor functions in prostate cancer
Source: Springer Nature journal article supplement (doi:10.1186/s12885-017-3141-8), 2017-02-24
Supplement: MOESM1 [file 12092072]

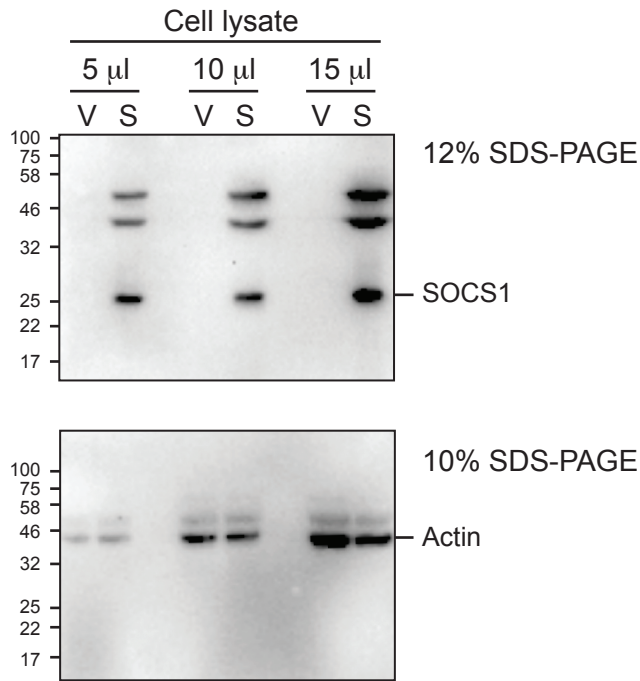

**Supplementary Figure 1. Specificity of the SOCS1 Ab.** Cos-7 cells cultured in 60mm Petri dishes were transfected with human SOCS1 construct (S) or the control vector pcDNA 3.0 (V). The transfected cells were lysed 36h later in 100  $\mu$ l SDS-PAGE sample buffer, and the indicated quantities of whole cell lysates were analyzed by western blot using the H-93 anti-SOCS1 Ab from Santa Cruz Biotechnology at 1:500 dilution. A duplicate blot was probed for actin (Ab from Sigma) that served as loading control for vector-transfected cells.
